# Supplementary material
Source: Elsevier journal article supplement (https://www.sciencedirect.com/science/article/pii/S0211699520301752)

**MATERIAL SUPLEMENTARIO**

***Tabla 1 :*** *Representación en porcentaje y en número absolutos entre paréntesis de los diferentes grados de calcificación valvular aórtica en la visita basal y a los 24 meses.*

|  | **Visita basal %** | **Visita 24 meses %** |
| --- | --- | --- |
| **Leve** | 24.2  (96) | 34.9  (139) |
| **Moderada** | 5.8  (23) | 6.8  (27) |
| **Grave** | 0.3-  (1) | 1.3  (5) |
| **No calcio** | 63.6  (252) | 49.2  (195) |
| **Valores perdidos** | 6.1  (25) | 7.8  (31) |

***Tabla 2:*** *Resultados del análisis univariante tomando como variable dependiente la presencia de calcificación aórtica.*

|  | OR | IC 95% | P valor |
| --- | --- | --- | --- |
| Calcio total (mg/dL)  *no corregido | 1.18 | 0.8-1.74 | 0.4 |
| PTHi (pg/mL) | 1 | 1.00-1.00 | 0.8 |
| PCR (mg/dl) | 0.983 | 0.952-1.015 | 0.289 |
| P (mg/dL) | 1.64 | 1.16-2.42 | **0.007** |
| Albúmina (g/dL) | 0.978 | 0.653-1.466 | 0.916 |
| Área total de placa | 1.23 | 0.8-1.95 | 0.4 |
| Área total placa carótida | 3.83 | 1.41-11.67 | **0.01** |
| Área total placa femoral | 1.05 | 0.65-1.70 | 0.9 |
| GIM medio total | 9.55 | 2.10-45.52 | **0.004** |
| Sexo (mujer) | 0.73 | 0.45-1.12 | 0.2 |
| Edad | 1.05 | 1.03-1.08 | **<0.001** |
| LDL-colesterol (mg/dl) | 1.00 | 0.99-1.01 | 0.7 |
| CT (mg/dL) | 1.00 | 1.00-1.01 | 0.8 |
| DM | 0.60 | 0.38-0.94 | **0.03** |
| ITB | 2.36 | 0.94-6.53 | 0.08 |
| IMC | 1.03 | 0.99-1.08 | 0.13 |
| Ca x P | 1.02 | 1.00-1.04 | 0.05 |
| PP (mmHg) | 1.02 | 1.00-1.03 | **0.009** |
| FGE (mL/min) | 0.99 | 0.98-1.00 | 0.2 |
| Captores de P de base cálcica | 0.81 | 0.44-1.50 | 0.5 |
| Vitamina D y análogos | 1.11 | 0.72, 1.72 | 0.6 |

***Figura 1:*** *Análisis mediante regresión logística de la relación entre el patrón de crecimiento de VI y la calcificación aórtica.*

*
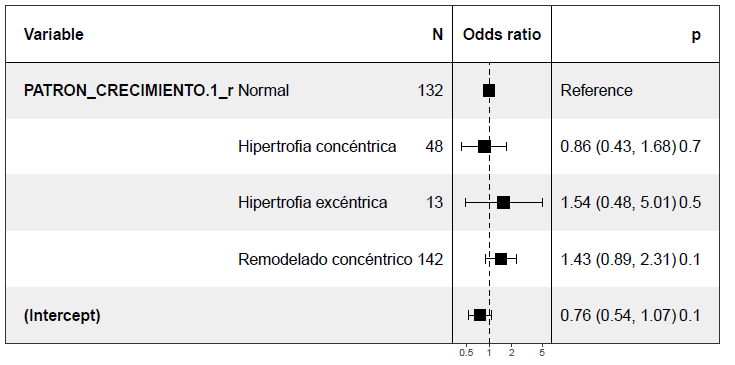
*

***Tabla 3:*** *Representación en porcentaje y en número absolutos (número entre paréntesis) de los diferentes grados de calcificación valvular mitral en la visita basal y a los 24 meses.*

|  | Visita basal % | Visita 24 meses % |
| --- | --- | --- |
| Leve | 20.2  (80) | 26.2  (104) |
| Moderada | 3  (12) | 3.5  (14) |
| Grave | 1  (4) | 1  (4) |
| No calcio | 72.5  (287) | 61.6  (244) |
| Valores perdidos | 3.3  (14) | 7.7  (31) |

***Tabla 4:*** *Representación en porcentaje y en número absolutos (número entre paréntesis) de los diferentes tipos de calcificación valvular mitral en la visita basal y a los 24 meses.*

|  | Visita basal % | Visita 24 meses % |
| --- | --- | --- |
| Anillo | 9.3  (37) | 12.1  (48) |
| Velo | 9.6  (38) | 10.8  (43) |
| Aparato subvalvular | 0.3  (1) | 0.5  (2) |
| Anillo, velos y aparato subvalvular | 3.5  (14) | 4.5  (18) |
| Valores perdidos | 77.3  (307) | 72  (286) |

***Tabla 5:*** *Resultados del análisis univariante tomando como variable dependiente la presencia de calcificación mitral.*

|  | OR | IC 95% | P valor |
| --- | --- | --- | --- |
| Calcio total (mg/dL)  *no corregido | 1.32 | 0.87-2.00 | 0.2 |
| PCR (mg/dl) | 1 | 0.974-1.026 | 0.986 |
| P (mg/dL) | 0.882 | 0.549-1.416 | 0.602 |
| Albúmina (g/dL) | 1.123 | 0.732-1.721 | 0.596 |
| PTH i (pg/mL) | 1 | 0.99-1.00 | 0.1 |
| Área total de placa | 1.27 | 0.83-1.96 | 0.261 |
| Área total placa carótida | 3.06 | 1.25-8.22 | 0.02 |
| Área total placa femoral | 1.17 | 0.72-1.90 | 0.519 |
| GIM medio total | 4.10 | 0.85-20.05 | 0.079 |
| Sexo (mujer) | 1.01 | 0.64-1.57 | 1 |
| Edad | 1.05 | 1.02-1.07 | **<0.001** |
| LDL-colesterol (mg/dL) | 1.01 | 1.00-1.01 | 0.179 |
| CT (mg/dL) | 1.00 | 1.00-1.01 | 0.46 |
| DM | 0.84 | 0.52-1.36 | 0.5 |
| ITB | 3.38 | 1.32-9.45 | **0.01** |
| - ITB ≤0.9 | 0.44 | 0.03-6.44 | 0.55 |
| - ITB≥1.4 | 63.30 | 3.47-4833.61 | **0.02** |
| IMC | 1.05 | 1.00-1.09 | **0.035** |
| Ca x P | 1.02 | 1.00-1.04 | **0.04** |
| PP (mmHg) | 1.02 | 1.00-1.03 | **0.01** |
| FGE (mL/min) | 1 | 0.98-1.01 | 0.79 |
| Captores de P de base cálcica | 0.72 | 0.38-1.36 | 0.3 |
| Vitamina D y análogos | 0.86 | 0.54- 1.36 | 0.5 |

***Figura 2****: Análisis mediante regresión logística de la relación entre el patrón de crecimiento de VI y la calcificación mitral.*


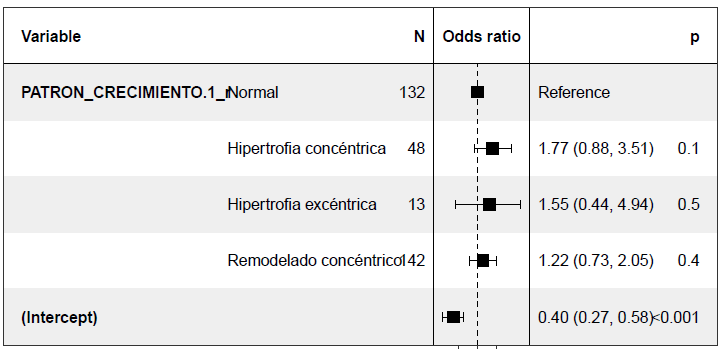

Supplement: mmc1 [file S0211699520301752:mmc1.docx]
